# Supplementary material for: Genetic diversity of the intimin gene (eae) in non-O157 Shiga toxin-producing Escherichia coli strains in China
Source: PubMed Central journal article supplement (PMC7040016; doi:10.1038/s41598-020-60225-w), 2020-02-24
Supplement: 41598_2020_60225_MOESM1_ESM.pdf [file 41598_2020_60225_MOESM1_ESM.pdf]

## **Supplementary Information**

### **Genetic diversity of the intimin gene (*eae*) in non-O157 Shiga toxin-producing *Escherichia coli* strains in China**

**Xi Yang<sup>1</sup>, Hui Sun<sup>1</sup>, Ruyue Fan<sup>1</sup>, Shanshan Fu<sup>1</sup>, Ji Zhang<sup>2</sup>, Andreas Matussek<sup>3</sup>, Yanwen Xiong<sup>1,4</sup>, Xiangning Bai<sup>1,3\*</sup>**

<sup>1</sup> State Key Laboratory of Infectious Disease Prevention and Control, National Institute for Communicable Disease Control and Prevention, Chinese Center for Disease Control and Prevention, Beijing, China.

<sup>2</sup> mEpiLab, New Zealand Food Safety Science & Research Centre, School of Veterinary Science, Massey University, New Zealand.

<sup>3</sup> Division of Clinical Microbiology, Department of Laboratory Medicine, Karolinska Institutet, Karolinska University Hospital, Huddinge, Sweden.

<sup>4</sup> Collaborative Innovation Center for Diagnosis and Treatment of Infectious Diseases, Hangzhou, China.

\*Corresponding author. Email: [baixiangning@icdc.cn](mailto:baixiangning@icdc.cn)

**Table S1. Characteristics of 735 non-O157 STEC strains used in this study**

| Strain  | Origin            | Location     | Year | O-serogroup | H-type | Virulence genes         |                         |            |
|---------|-------------------|--------------|------|-------------|--------|-------------------------|-------------------------|------------|
|         |                   |              |      |             |        | <i>stx</i> <sub>1</sub> | <i>stx</i> <sub>2</sub> | <i>eae</i> |
| STEC003 | Goat              | Henan        | 2009 | O45         | H2     | 1c                      | 2d                      | -          |
| STEC004 | Goat              | Henan        | 2009 | O118        | H16    | -                       | 2d                      | -          |
| STEC005 | Goat              | Henan        | 2009 | O39         | H19    | -                       | 2e                      | -          |
| STEC006 | Goat              | Henan        | 2009 | O45         | H2     | 1c                      | 2d                      | -          |
| STEC007 | Goat              | Henan        | 2009 | O91         | H14    | 1c                      | 2d                      | -          |
| STEC008 | Goat              | Henan        | 2009 | O21         | H25    | -                       | 2d                      | -          |
| STEC009 | Goat              | Henan        | 2009 | O91         | H14    | 1c                      | 2d                      | -          |
| STEC010 | Goat              | Henan        | 2009 | O110        | H16    | 1a                      | 2d                      | -          |
| STEC011 | Goat              | Henan        | 2009 | O103        | H8     | 1c                      | -                       | -          |
| STEC012 | Goat              | Henan        | 2009 | O21         | H25    | 1a                      | -                       | -          |
| STEC013 | Goat              | Henan        | 2009 | O21         | H25    | 1a                      | -                       | -          |
| STEC014 | Goat              | Henan        | 2009 | O21         | H25    | 1a                      | -                       | -          |
| STEC015 | Goat              | Henan        | 2009 | O103        | H8     | 1c                      | -                       | -          |
| STEC016 | Goat              | Henan        | 2009 | O103        | H8     | 1c                      | -                       | -          |
| STEC017 | Goat              | Henan        | 2009 | O141ac      | H25    | -                       | 2g                      | -          |
| STEC018 | Goat              | Henan        | 2009 | O15         | H21    | 1a                      | -                       | -          |
| STEC019 | Goat              | Henan        | 2009 | O12         | H21    | 1a                      | -                       | -          |
| STEC020 | Goat              | Henan        | 2009 | O12         | H21    | 1a                      | -                       | -          |
| STEC021 | Goat              | Henan        | 2009 | O21         | H25    | 1a                      | -                       | -          |
| STEC022 | Goat              | Henan        | 2009 | O21         | H25    | 1a                      | -                       | -          |
| STEC023 | Goat              | Henan        | 2009 | O103        | H8     | 1c                      | -                       | -          |
| STEC024 | Goat              | Henan        | 2009 | O103        | H8     | 1c                      | -                       | -          |
| STEC025 | Goat              | Henan        | 2009 | O103        | H8     | 1c                      | -                       | -          |
| STEC026 | Goat              | Henan        | 2009 | O103        | H8     | 1c                      | -                       | -          |
| STEC027 | Goat              | Henan        | 2009 | O103        | H8     | 1c                      | -                       | -          |
| STEC028 | Goat              | Henan        | 2009 | OUT         | H21    | 1c                      | -                       | -          |
| STEC029 | Goat              | Henan        | 2009 | O15         | H21    | 1c                      | -                       | -          |
| STEC030 | Goat              | Henan        | 2009 | OUT         | H21    | 1a                      | -                       | -          |
| STEC031 | Diarrheal patient | Henan        | 2011 | O107        | H7     | 1a                      | -                       | -          |
| STEC032 | Diarrheal patient | Henan        | 2011 | O107        | H7     | 1a                      | -                       | -          |
| STEC033 | Beef cattle       | Heilongjiang | 2009 | O113        | H19    | 1a                      | 2a                      | -          |
| STEC036 | Yak               | Qinghai      | 2012 | NT          | H21    | -                       | 2d                      | -          |
| STEC037 | Yak               | Qinghai      | 2012 | NT          | H44    | 1a                      | -                       | -          |
| STEC038 | Yak               | Qinghai      | 2012 | O8          | H9     | 1a                      | 2d                      | -          |
| STEC039 | Yak               | Qinghai      | 2012 | NT          | H7     | 1a                      | -                       | -          |
| STEC040 | Yak               | Qinghai      | 2012 | O6          | H21    | 1a                      | -                       | -          |
| STEC041 | Yak               | Qinghai      | 2012 | O6          | H21    | 1a                      | -                       | -          |
| STEC042 | Yak               | Qinghai      | 2012 | O78         | H45    | -                       | 2g                      | -          |
| STEC043 | Yak               | Qinghai      | 2012 | O8          | H9     | 1a                      | 2d                      | -          |
| STEC044 | Yak               | Qinghai      | 2012 | O8          | H16    | -                       | 2b                      | -          |
| STEC045 | Yak               | Qinghai      | 2012 | O8          | H9     | 1a                      | 2d                      | -          |
| STEC046 | Yak               | Qinghai      | 2012 | O6          | NT     | 1a                      | -                       | -          |
| STEC047 | Yak               | Qinghai      | 2012 | O165        | H21    | 1a                      | -                       | -          |
| STEC047 | Yak               | Qinghai      | 2012 | O78         | H45    | -                       | 2g                      | -          |
| STEC048 | Yak               | Qinghai      | 2012 | O78         | H45    | -                       | 2g                      | -          |
| STEC049 | Yak               | Qinghai      | 2012 | NT          | NT     | -                       | 2c                      | -          |
| STEC050 | Yak               | Qinghai      | 2012 | O8          | H19    | 1a                      | -                       | -          |
| STEC051 | Yak               | Qinghai      | 2012 | NT          | H21    | 1a                      | -                       | -          |
| STEC052 | Yak               | Qinghai      | 2012 | NT          | H21    | 1a                      | -                       | -          |

|         |     |         |      |         |     |    |       |   |
|---------|-----|---------|------|---------|-----|----|-------|---|
| STEC053 | Yak | Qinghai | 2012 | NT      | NT  | 1a | 2a+2b | - |
| STEC054 | Yak | Qinghai | 2012 | NT      | H8  | 1a | 2a+2b | - |
| STEC055 | Yak | Qinghai | 2012 | O66     | H8  | 1a | -     | - |
| STEC056 | Yak | Qinghai | 2012 | O78     | NT  | -  | 2a    | + |
| STEC057 | Yak | Qinghai | 2012 | O78     | H21 | -  | 2c    | - |
| STEC058 | Yak | Qinghai | 2012 | O22     | H8  | -  | 2b    | - |
| STEC059 | Yak | Qinghai | 2012 | O12/O78 | H44 | -  | 2d    | - |
| STEC060 | Yak | Qinghai | 2012 | O117    | H21 | -  | 2b    | - |
| STEC061 | Yak | Qinghai | 2012 | O78     | H45 | -  | 2g    | - |
| STEC062 | Yak | Qinghai | 2012 | O8      | H45 | -  | 2g    | - |
| STEC063 | Yak | Qinghai | 2012 | O8      | H19 | 1a | -     | - |
| STEC064 | Yak | Qinghai | 2012 | O8      | H19 | 1a | -     | - |
| STEC065 | Yak | Qinghai | 2012 | O8      | H9  | 1a | 2d    | - |
| STEC066 | Yak | Qinghai | 2012 | O8      | H9  | 1a | 2d    | - |
| STEC067 | Yak | Qinghai | 2012 | O8      | H16 | -  | 2b    | - |
| STEC068 | Yak | Qinghai | 2012 | O78     | H21 | -  | 2a    | + |
| STEC069 | Yak | Qinghai | 2012 | O52     | H2  | -  | 2b    | - |
| STEC070 | Yak | Qinghai | 2012 | O78     | H45 | -  | 2g    | - |
| STEC071 | Yak | Qinghai | 2012 | O8      | H9  | 1a | 2d    | - |
| STEC072 | Yak | Qinghai | 2012 | O8      | H9  | 1a | 2d    | - |
| STEC073 | Yak | Qinghai | 2012 | O8      | H9  | 1a | 2d    | - |
| STEC074 | Yak | Qinghai | 2012 | O117    | H21 | -  | 2b    | - |
| STEC075 | Yak | Qinghai | 2012 | O66     | H21 | -  | 2a+2b | - |
| STEC076 | Yak | Qinghai | 2012 | NT      | H8  | -  | 2b    | - |
| STEC077 | Yak | Qinghai | 2012 | O158    | H8  | -  | 2b    | - |
| STEC078 | Yak | Qinghai | 2012 | O158    | H8  | -  | 2b    | - |
| STEC079 | Yak | Qinghai | 2012 | O2      | H45 | 1a | -     | - |
| STEC080 | Yak | Qinghai | 2012 | O2      | H45 | 1a | -     | - |
| STEC081 | Yak | Qinghai | 2012 | O78     | H8  | -  | 2a    | - |
| STEC082 | Yak | Qinghai | 2012 | O78     | H8  | -  | 2a    | - |
| STEC083 | Yak | Qinghai | 2012 | O2      | H45 | 1a | -     | - |
| STEC084 | Yak | Qinghai | 2012 | O66     | H21 | -  | 2a+2b | - |
| STEC085 | Yak | Qinghai | 2012 | O8      | H16 | -  | 2b    | - |
| STEC086 | Yak | Qinghai | 2012 | O8      | H45 | -  | 2b    | - |
| STEC087 | Yak | Qinghai | 2012 | O8      | H45 | -  | 2b    | - |
| STEC088 | Yak | Qinghai | 2012 | O22     | H8  | -  | 2b    | - |
| STEC089 | Yak | Qinghai | 2012 | NT      | H21 | 1a | -     | - |
| STEC090 | Yak | Qinghai | 2012 | O22     | H8  | -  | 2b    | - |
| STEC091 | Yak | Qinghai | 2012 | NT      | H21 | 1a | -     | - |
| STEC092 | Yak | Qinghai | 2012 | NT      | H8  | -  | 2b    | - |
| STEC093 | Yak | Qinghai | 2012 | O2      | H45 | 1a | -     | - |
| STEC094 | Yak | Qinghai | 2012 | O137    | H21 | 1a | 2a    | - |
| STEC095 | Yak | Qinghai | 2012 | NT      | H8  | 1a | -     | - |
| STEC096 | Yak | Qinghai | 2012 | O127    | H8  | 1a | 2d    | - |
| STEC097 | Yak | Qinghai | 2012 | O2      | H45 | 1a | -     | - |
| STEC098 | Yak | Qinghai | 2012 | O117    | H21 | -  | 2b    | - |
| STEC099 | Yak | Qinghai | 2012 | O117    | H21 | -  | 2b    | - |
| STEC100 | Yak | Qinghai | 2012 | NT      | H8  | 1a | 2b    | - |
| STEC101 | Yak | Qinghai | 2012 | O8      | H2  | -  | 2d    | - |
| STEC102 | Yak | Qinghai | 2012 | O165    | H8  | 1a | -     | - |
| STEC103 | Yak | Qinghai | 2012 | O165    | H8  | 1a | -     | - |
| STEC104 | Yak | Qinghai | 2012 | O8      | H16 | -  | 2b    | - |
| STEC105 | Yak | Qinghai | 2012 | O8      | H16 | -  | 2b    | - |
| STEC106 | Yak | Qinghai | 2012 | O117    | H2  | -  | 2b    | - |

|         |     |         |      |      |     |    |       |   |
|---------|-----|---------|------|------|-----|----|-------|---|
| STEC107 | Yak | Qinghai | 2012 | O117 | H2  | -  | 2b    | - |
| STEC108 | Yak | Qinghai | 2012 | O117 | H2  | -  | 2b    | - |
| STEC109 | Yak | Qinghai | 2012 | O117 | H2  | -  | 2b    | - |
| STEC110 | Yak | Qinghai | 2012 | O8   | H16 | -  | 2b    | - |
| STEC111 | Yak | Qinghai | 2012 | O8   | H16 | -  | 2b    | - |
| STEC112 | Yak | Qinghai | 2012 | O117 | H21 | -  | 2b    | - |
| STEC113 | Yak | Qinghai | 2012 | O117 | H21 | -  | 2b    | - |
| STEC114 | Yak | Qinghai | 2012 | O117 | H21 | -  | 2b    | - |
| STEC115 | Yak | Qinghai | 2012 | O6   | H14 | -  | 2b    | - |
| STEC116 | Yak | Qinghai | 2012 | O6   | H14 | -  | 2b    | - |
| STEC117 | Yak | Qinghai | 2012 | O158 | H16 | -  | 2b    | - |
| STEC118 | Yak | Qinghai | 2012 | O8   | H16 | -  | 2b    | - |
| STEC119 | Yak | Qinghai | 2012 | NT   | H8  | 1a | 2d    | - |
| STEC120 | Yak | Qinghai | 2012 | O165 | H8  | 1a | 2d    | - |
| STEC121 | Yak | Qinghai | 2012 | O117 | H21 | -  | 2b    | - |
| STEC122 | Yak | Qinghai | 2012 | NT   | H40 | -  | 2b    | - |
| STEC123 | Yak | Qinghai | 2012 | O117 | H21 | -  | 2b    | - |
| STEC124 | Yak | Qinghai | 2012 | O117 | H21 | -  | 2b    | - |
| STEC125 | Yak | Qinghai | 2012 | O8   | H16 | -  | 2b    | - |
| STEC126 | Yak | Qinghai | 2012 | O117 | H21 | -  | 2b    | - |
| STEC127 | Yak | Qinghai | 2012 | O78  | H8  | 1a | 2d    | - |
| STEC128 | Yak | Qinghai | 2012 | O78  | H8  | 1a | 2d    | - |
| STEC129 | Yak | Qinghai | 2012 | NT   | H21 | 1a | 2d    | - |
| STEC130 | Yak | Qinghai | 2012 | NT   | H21 | 1a | 2d    | - |
| STEC131 | Yak | Qinghai | 2012 | NT   | H44 | 1a | -     | - |
| STEC132 | Yak | Qinghai | 2012 | O123 | H8  | 1a | 2b    | - |
| STEC133 | Yak | Qinghai | 2012 | O8   | H16 | -  | 2b    | - |
| STEC134 | Yak | Qinghai | 2012 | O8   | H16 | -  | 2b    | - |
| STEC135 | Yak | Qinghai | 2012 | O8   | H16 | -  | 2b    | - |
| STEC136 | Yak | Qinghai | 2012 | O8   | H16 | -  | 2b    | - |
| STEC137 | Yak | Qinghai | 2012 | O8   | H16 | -  | 2b    | - |
| STEC138 | Yak | Qinghai | 2012 | O149 | H45 | -  | 2d    | - |
| STEC139 | Yak | Qinghai | 2012 | O149 | H45 | -  | 2d    | - |
| STEC140 | Yak | Qinghai | 2012 | NT   | H8  | -  | 2a    | - |
| STEC141 | Yak | Qinghai | 2012 | NT   | H8  | -  | 2a    | - |
| STEC142 | Yak | Qinghai | 2012 | O2   | H45 | 1a | -     | - |
| STEC143 | Yak | Qinghai | 2012 | O2   | H45 | 1a | -     | - |
| STEC144 | Yak | Qinghai | 2012 | O78  | H45 | -  | 2a+2c | - |
| STEC145 | Yak | Qinghai | 2012 | O78  | H21 | -  | 2a+2c | - |
| STEC146 | Yak | Qinghai | 2012 | O2   | H21 | -  | 2a+2c | - |
| STEC147 | Yak | Qinghai | 2012 | O2   | H45 | 1a | -     | - |
| STEC148 | Yak | Qinghai | 2012 | O22  | H8  | -  | 2b    | - |
| STEC149 | Yak | Qinghai | 2012 | O2   | H45 | 1a | -     | - |
| STEC150 | Yak | Qinghai | 2012 | O2   | H45 | 1a | -     | - |
| STEC151 | Yak | Qinghai | 2012 | O2   | H45 | 1a | -     | - |
| STEC152 | Yak | Qinghai | 2012 | O78  | H8  | -  | 2a    | - |
| STEC153 | Yak | Qinghai | 2012 | O78  | H8  | -  | 2a    | - |
| STEC154 | Yak | Qinghai | 2012 | O78  | H44 | -  | 2d    | - |
| STEC155 | Yak | Qinghai | 2012 | O12  | H12 | 1a | -     | - |
| STEC156 | Yak | Qinghai | 2012 | O78  | H8  | -  | 2a    | - |
| STEC157 | Yak | Qinghai | 2012 | O2   | H45 | 1a | -     | - |
| STEC158 | Yak | Qinghai | 2012 | O78  | H8  | -  | 2a+2c | - |
| STEC159 | Yak | Qinghai | 2012 | O2   | H45 | 1a | -     | - |
| STEC160 | Yak | Qinghai | 2012 | O2   | H45 | 1a | -     | - |

|         |     |           |      |      |     |   |    |   |
|---------|-----|-----------|------|------|-----|---|----|---|
| STEC161 | Yak | Qinghai   | 2012 | O52  | H2  | - | 2b | - |
| STEC162 | Yak | Qinghai   | 2012 | O52  | H2  | - | 2b | - |
| STEC163 | Pig | Chongqing | 2012 | O2   | H32 | - | 2e | - |
| STEC164 | Pig | Chongqing | 2012 | O2   | H32 | - | 2e | - |
| STEC165 | Pig | Chongqing | 2012 | O2   | H32 | - | 2e | - |
| STEC166 | Pig | Chongqing | 2012 | O2   | H32 | - | 2e | - |
| STEC167 | Pig | Chongqing | 2012 | O2   | H32 | - | 2e | - |
| STEC168 | Pig | Chongqing | 2012 | O2   | H32 | - | 2e | - |
| STEC169 | Pig | Chongqing | 2012 | O2   | H32 | - | 2e | - |
| STEC170 | Pig | Chongqing | 2012 | O2   | H32 | - | 2e | - |
| STEC171 | Pig | Chongqing | 2012 | O116 | H11 | - | 2e | - |
| STEC172 | Pig | Chongqing | 2012 | O2   | H32 | - | 2e | - |
| STEC173 | Pig | Chongqing | 2012 | O20  | H30 | - | 2e | - |
| STEC174 | Pig | Chongqing | 2012 | O20  | H26 | - | 2e | - |
| STEC175 | Pig | Chongqing | 2012 | O20  | H30 | - | 2e | - |
| STEC176 | Pig | Chongqing | 2012 | O76  | H25 | - | 2e | - |
| STEC177 | Pig | Chongqing | 2012 | O20  | H26 | - | 2e | - |
| STEC178 | Pig | Chongqing | 2012 | O20  | H30 | - | 2e | - |
| STEC179 | Pig | Chongqing | 2012 | O20  | H30 | - | 2e | - |
| STEC180 | Pig | Chongqing | 2012 | NT   | H30 | - | 2e | - |
| STEC181 | Pig | Chongqing | 2012 | NT   | H30 | - | 2e | - |
| STEC182 | Pig | Chongqing | 2012 | O114 | H30 | - | 2e | - |
| STEC183 | Pig | Chongqing | 2012 | O65  | H30 | - | 2e | - |
| STEC184 | Pig | Chongqing | 2012 | O100 | H20 | - | 2e | - |
| STEC185 | Pig | Chongqing | 2012 | O100 | H20 | - | 2e | - |
| STEC186 | Pig | Chongqing | 2012 | O20  | H30 | - | 2e | - |
| STEC187 | Pig | Chongqing | 2012 | O20  | H30 | - | 2e | - |
| STEC188 | Pig | Beijing   | 2012 | NT   | H21 | - | 2e | - |
| STEC189 | Pig | Beijing   | 2012 | NT   | H21 | - | 2e | - |
| STEC190 | Pig | Beijing   | 2012 | NT   | H33 | - | 2e | - |
| STEC191 | Pig | Beijing   | 2012 | NT   | H30 | - | 2e | - |
| STEC192 | Pig | Beijing   | 2012 | O2   | H32 | - | 2e | - |
| STEC193 | Pig | Beijing   | 2012 | O2   | H32 | - | 2e | - |
| STEC194 | Pig | Beijing   | 2012 | NT   | H30 | - | 2e | - |
| STEC195 | Pig | Beijing   | 2012 | NT   | H30 | - | 2e | - |
| STEC196 | Pig | Beijing   | 2012 | O2   | H30 | - | 2e | - |
| STEC197 | Pig | Beijing   | 2012 | O172 | H30 | - | 2e | - |
| STEC198 | Pig | Beijing   | 2012 | O172 | H30 | - | 2e | - |
| STEC199 | Pig | Beijing   | 2012 | O20  | H30 | - | 2e | - |
| STEC200 | Pig | Beijing   | 2012 | O20  | H30 | - | 2e | - |
| STEC201 | Pig | Beijing   | 2012 | O20  | H30 | - | 2e | - |
| STEC202 | Pig | Beijing   | 2012 | O20  | H30 | - | 2e | - |
| STEC203 | Pig | Beijing   | 2012 | NT   | H30 | - | 2e | - |
| STEC204 | Pig | Beijing   | 2012 | O20  | H30 | - | 2e | - |
| STEC205 | Pig | Beijing   | 2012 | O20  | H30 | - | 2e | - |
| STEC206 | Pig | Beijing   | 2012 | O20  | H30 | - | 2e | - |
| STEC207 | Pig | Beijing   | 2012 | O20  | H30 | - | 2e | - |
| STEC208 | Pig | Beijing   | 2012 | NT   | H30 | - | 2e | - |
| STEC209 | Pig | Beijing   | 2012 | NT   | H30 | - | 2e | - |
| STEC210 | Pig | Beijing   | 2012 | O7   | H30 | - | 2e | - |
| STEC211 | Pig | Beijing   | 2012 | NT   | H19 | - | 2e | - |
| STEC212 | Pig | Beijing   | 2012 | NT   | H19 | - | 2e | - |
| STEC213 | Pig | Beijing   | 2012 | NT   | H19 | - | 2e | - |
| STEC214 | Pig | Beijing   | 2012 | O100 | H30 | - | 2e | - |

|         |     |         |      |         |     |   |    |   |
|---------|-----|---------|------|---------|-----|---|----|---|
| STEC215 | Pig | Beijing | 2012 | O20     | H30 | - | 2e | - |
| STEC216 | Pig | Beijing | 2012 | O20     | H30 | - | 2e | - |
| STEC217 | Pig | Beijing | 2012 | O20     | H30 | - | 2e | - |
| STEC218 | Pig | Beijing | 2012 | O20     | H30 | - | 2e | - |
| STEC219 | Pig | Beijing | 2012 | O114    | H30 | - | 2e | - |
| STEC220 | Pig | Beijing | 2012 | O7      | H42 | - | 2e | - |
| STEC221 | Pig | Beijing | 2012 | O172    | H30 | - | 2e | - |
| STEC222 | Pig | Beijing | 2012 | NT      | H30 | - | 2e | - |
| STEC223 | Pig | Beijing | 2012 | NT      | H30 | - | 2e | - |
| STEC224 | Pig | Beijing | 2012 | NT      | H30 | - | 2e | - |
| STEC225 | Pig | Beijing | 2012 | NT      | H30 | - | 2e | - |
| STEC226 | Pig | Beijing | 2012 | NT      | H30 | - | 2e | - |
| STEC227 | Pig | Beijing | 2012 | NT      | H30 | - | 2e | - |
| STEC228 | Pig | Beijing | 2012 | NT      | H30 | - | 2e | - |
| STEC229 | Pig | Beijing | 2012 | NT      | H20 | - | 2e | - |
| STEC230 | Pig | Beijing | 2012 | NT      | H20 | - | 2e | - |
| STEC231 | Pig | Beijing | 2012 | NT      | NT  | - | 2e | - |
| STEC232 | Pig | Beijing | 2012 | NT      | H20 | - | 2e | - |
| STEC233 | Pig | Beijing | 2012 | O65     | H30 | - | 2e | - |
| STEC234 | Pig | Beijing | 2012 | O142    | H27 | - | 2e | - |
| STEC235 | Pig | Beijing | 2012 | O86     | H11 | - | 2e | - |
| STEC236 | Pig | Beijing | 2012 | NT      | H30 | - | 2e | - |
| STEC237 | Pig | Beijing | 2012 | O20     | H30 | - | 2e | - |
| STEC238 | Pig | Beijing | 2012 | O9      | H30 | - | 2e | - |
| STEC239 | Pig | Beijing | 2012 | NT      | H30 | - | 2e | - |
| STEC240 | Pig | Beijing | 2012 | O143    | H38 | - | 2e | - |
| STEC241 | Pig | Beijing | 2012 | O143    | H38 | - | 2e | - |
| STEC242 | Pig | Beijing | 2012 | NT      | H17 | - | 2e | - |
| STEC243 | Pig | Beijing | 2012 | NT      | H17 | - | 2e | - |
| STEC244 | Pig | Beijing | 2012 | O5(O70) | H30 | - | 2e | - |
| STEC245 | Pig | Beijing | 2012 | O5(O70) | H30 | - | 2e | - |
| STEC246 | Pig | Beijing | 2012 | O65     | H30 | - | 2e | - |
| STEC247 | Pig | Beijing | 2012 | O20     | H30 | - | 2e | - |
| STEC248 | Pig | Beijing | 2012 | NT      | H30 | - | 2e | - |
| STEC249 | Pig | Beijing | 2012 | NT      | H30 | - | 2e | - |
| STEC250 | Pig | Beijing | 2012 | O20     | H30 | - | 2e | - |
| STEC251 | Pig | Beijing | 2012 | NT      | H30 | - | 2e | - |
| STEC252 | Pig | Beijing | 2012 | O9      | H30 | - | 2e | - |
| STEC253 | Pig | Beijing | 2012 | O100    | H30 | - | 2e | - |
| STEC254 | Pig | Beijing | 2012 | O5(O70) | H30 | - | 2e | - |
| STEC255 | Pig | Beijing | 2012 | O86     | H11 | - | 2e | - |
| STEC256 | Pig | Beijing | 2012 | O9      | H30 | - | 2e | - |
| STEC257 | Pig | Beijing | 2012 | O9      | H30 | - | 2e | - |
| STEC258 | Pig | Beijing | 2012 | O20     | H30 | - | 2e | - |
| STEC259 | Pig | Beijing | 2012 | O71     | H30 | - | 2e | - |
| STEC260 | Pig | Beijing | 2012 | O116    | H30 | - | 2e | - |
| STEC261 | Pig | Beijing | 2012 | O65     | H30 | - | 2e | - |
| STEC262 | Pig | Beijing | 2012 | O65     | H30 | - | 2e | - |
| STEC263 | Pig | Beijing | 2012 | O65     | H30 | - | 2e | - |
| STEC264 | Pig | Beijing | 2012 | NT      | H30 | - | 2e | - |
| STEC265 | Pig | Beijing | 2012 | O100    | H30 | - | 2e | - |
| STEC266 | Pig | Beijing | 2012 | O143    | H38 | - | 2e | - |
| STEC267 | Pig | Beijing | 2012 | NT      | H19 | - | 2e | - |
| STEC268 | Pig | Harbin  | 2012 | O100    | H30 | - | 2  | - |

|         |                           |              |         |          |     |    |    |   |
|---------|---------------------------|--------------|---------|----------|-----|----|----|---|
| STEC269 | Pig                       | Harbin       | 2012    | O173     | H21 | -  | 2  | - |
| STEC270 | Pig                       | Harbin       | 2012    | O2 (O50) | H30 | -  | 2  | - |
| STEC271 | Pig                       | Harbin       | 2012    | O2 (O50) | H30 | -  | 2  | - |
| STEC272 | Pig                       | Harbin       | 2012    | O2 (O50) | H30 | -  | 2  | - |
| STEC273 | Pig                       | Harbin       | 2012    | O2 (O50) | H32 | -  | 2  | - |
| STEC274 | Pig                       | Harbin       | 2012    | O2 (O50) | H32 | -  | 2  | - |
| STEC275 | Pig                       | Harbin       | 2012    | O168     | H38 | -  | 2  | - |
| STEC276 | Beef cattle               | Harbin       | 2012    | NT       | H30 | -  | 2g | - |
| STEC277 | Beef cattle               | Harbin       | 2012    | O71      | H30 | -  | 2  | - |
| STEC278 | Beef cattle               | Harbin       | 2012    | NT       | H30 | -  | 2g | - |
| STEC280 | Beef cattle               | Harbin       | 2012    | NT       | H30 | -  | 2g | - |
| STEC281 | Beef cattle               | Harbin       | 2012    | O22      | H8  | 1a | 2d | - |
| STEC282 | Cow                       | Heilongjiang | 2012    | O181     | H4  | -  | 2d | - |
| STEC283 | Cow                       | Heilongjiang | 2012    | NT       | H9  | -  | 2g | - |
| STEC284 | Cow                       | Heilongjiang | 2012    | NT       | H9  | -  | 2g | - |
| STEC285 | Cow                       | Heilongjiang | 2012    | O81      | H31 | -  | 2d | - |
| STEC286 | Cow                       | Heilongjiang | 2012    | O81      | H31 | -  | 2d | - |
| STEC287 | Beef cattle               | Heilongjiang | 2012    | O99      | H10 | -  | 2  | - |
| STEC288 | Cow                       | Heilongjiang | 2012    | O81      | H31 | -  | 2d | - |
| STEC289 | <i>Marmota himalayana</i> | Qinghai      | 2012    | O112ab   | H8  | 1  | -  | - |
| STEC291 | <i>Marmota himalayana</i> | Qinghai      | 2012    | O5       | NT  | 1  | -  | - |
| STEC292 | <i>Marmota himalayana</i> | Qinghai      | 2012    | O5       | NT  | 1  | -  | - |
| STEC293 | <i>Marmota himalayana</i> | Qinghai      | 2013    | O53      | H18 | -  | 2h | - |
| STEC294 | <i>Marmota himalayana</i> | Qinghai      | 2013    | O53      | H18 | -  | 2h | - |
| STEC295 | <i>Marmota himalayana</i> | Qinghai      | 2013    | O53      | H18 | -  | 2h | - |
| STEC296 | <i>Marmota himalayana</i> | Qinghai      | 2013    | O71      | H8  | -  | 2a | - |
| STEC298 | Plateau Pika              | Qinghai      | 2013    | O74      | H8  | -  | 2d | - |
| STEC299 | <i>Marmota himalayana</i> | Qinghai      | 2013    | O53      | H18 | -  | 2h | - |
| STEC300 | Raw beef                  | Sichuan      | 2013    | O96      | H19 | -  | 2a | - |
| STEC301 | pork                      | Sichuan      | 2013    | O141     | H29 | -  | 2e | - |
| STEC302 | Raw beef                  | Sichuan      | 2013    | O22      | H16 | -  | 2b | - |
| STEC304 | Raw beef                  | Beijing      | 2013    | O40      | H8  | -  | 2a | - |
| STEC305 | Raw beef                  | Beijing      | 2013    | O40      | H8  | -  | 2a | - |
| STEC306 | Food                      | Beijing      | 2013    | O8       | H9  | -  | 2e | - |
| STEC307 | Food                      | Beijing      | 2013    | O8       | H9  | -  | 2e | - |
| STEC308 | Food                      | Beijing      | 2013    | O8       | H9  | -  | 2e | - |
| STEC309 | Diarrheal patient         | Sichuan      | 2013    | O48      | H21 | -  | 2e | - |
| STEC310 | Diarrheal patient         | Shanghai     | 2013    | O5       | NT  | 1  | -  | + |
| STEC311 | Diarrheal patient         | Shanghai     | 2013    | O68      | H10 | 1  | -  | - |
| STEC312 | Diarrheal patient         | Shanghai     | 2013    | O26      | H11 | 1  | -  | + |
| STEC313 | Raw beef                  | Beijing      | 2013    | O100     | H19 | -  | 2e | - |
| STEC314 | Raw pork                  | Beijing      | 2013    | O98      | H10 | -  | 2e | - |
| STEC315 | Raw pork                  | Beijing      | 2013    | O98      | H30 | -  | 2e | - |
| STEC316 | Raw beef                  | Beijing      | 2014    | O100     | H19 | -  | 2e | - |
| STEC317 | Raw mutton                | Beijing      | 2014    | NT       | H21 | 1c | -  | - |
| STEC318 | Raw pork                  | Beijing      | 2014    | O121     | H10 | -  | 2e | - |
| STEC319 | Raw mutton                | Beijing      | 2014    | O176     | H4  | 1c | 2b | - |
| STEC320 | Raw mutton                | Beijing      | 2014    | O5       | H19 | 1c | 2b | - |
| STEC321 | Raw mutton                | Beijing      | 2014    | O128     | H2  | 1c | 2b | - |
| STEC322 | Raw chicken meat          | Beijing      | 2014    | O176     | H4  | 1c | -  | - |
| STEC323 | Raw duck meat             | Beijing      | 2014    | O176     | H4  | 1c | -  | - |
| STEC325 | unknown                   | unknown      | unknown | O174     | H8  | 1c | 2b | - |
| STEC326 | unknown                   | unknown      | unknown | O8       | NT  | 1d | -  | - |
| STEC327 | unknown                   | unknown      | unknown | O118     | H12 | -  | 2b | - |

|         |            |         |         |        |     |    |    |   |
|---------|------------|---------|---------|--------|-----|----|----|---|
| STEC328 | unknown    | unknown | unknown | O139   | H1  | -  | 2e | - |
| STEC329 | unknown    | unknown | unknown | O128ac | H2  | -  | 2f | + |
| STEC330 | unknown    | unknown | unknown | O2     | H25 | -  | 2g | - |
| STEC332 | unknown    | unknown | unknown | O166   | H15 | -  | 2d | - |
| STEC333 | unknown    | unknown | unknown | O113   | H4  | 1c | 2b | - |
| STEC334 | unknown    | unknown | unknown | O121   | H19 | -  | 2a | + |
| STEC335 | unknown    | unknown | unknown | O128ab | NT  | 1c | -  | - |
| STEC336 | unknown    | unknown | unknown | O41    | H26 | 1d | -  | - |
| STEC337 | unknown    | unknown | unknown | O26    | H11 | -  | 2a | + |
| STEC338 | unknown    | unknown | unknown | O111   | NT  | 1a | -  | + |
| STEC340 | unknown    | unknown | unknown | O146   | H21 | -  | 2d | - |
| STEC341 | unknown    | unknown | unknown | O103   | H2  | 1a | -  | + |
| STEC343 | unknown    | unknown | unknown | O166   | H15 | -  | 2d | - |
| STEC344 | Raw mutton | Beijing | 2014    | O8     | H30 | -  | 2e | - |
| STEC345 | Raw pork   | Beijing | 2014    | O57    | H21 | -  | 2e | - |
| STEC346 | Raw pork   | Beijing | 2014    | O8     | H19 | -  | 2e | - |
| STEC347 | Raw beef   | Beijing | 2014    | O110   | H16 | 1c | -  | - |
| STEC348 | Raw beef   | Beijing | 2014    | O103   | H25 | 1a | -  | + |
| STEC349 | Raw beef   | Beijing | 2014    | O98    | H30 | -  | 2e | - |
| STEC350 | Raw beef   | Beijing | 2014    | O103   | H25 | 1a | -  | + |
| STEC351 | Raw beef   | Beijing | 2014    | O98    | H30 | -  | 2e | - |
| STEC352 | Raw mutton | Beijing | 2014    | O120   | H16 | 1c | -  | - |
| STEC353 | Raw beef   | Beijing | 2014    | O128   | H2  | 1c | 2b | - |
| STEC354 | Raw beef   | Beijing | 2014    | O128   | H2  | 1c | 2b | - |
| STEC355 | Raw beef   | Beijing | 2014    | O128   | H2  | 1c | 2b | - |
| STEC356 | Raw mutton | Beijing | 2014    | O161   | H19 | 1c | -  | - |
| STEC357 | Raw mutton | Beijing | 2014    | O176   | H4  | 1c | -  | - |
| STEC358 | Raw mutton | Beijing | 2014    | O104   | H7  | 1c | -  | - |
| STEC359 | Raw mutton | Beijing | 2014    | O128   | H2  | 1c | 2b | - |
| STEC360 | Raw mutton | Beijing | 2014    | O176   | H4  | 1c | -  | - |
| STEC361 | Raw mutton | Beijing | 2014    | O21    | H25 | 1a | -  | - |
| STEC362 | Raw mutton | Beijing | 2014    | O91    | H14 | 1a | 2b | - |
| STEC363 | Raw mutton | Beijing | 2014    | O104   | H7  | 1c | -  | - |
| STEC364 | Raw mutton | Beijing | 2014    | O128   | H2  | 1c | 2b | - |
| STEC365 | Raw beef   | Beijing | 2014    | O12    | NT  | -  | 2c | + |
| STEC366 | Raw beef   | Beijing | 2014    | O128   | H2  | 1c | -  | - |
| STEC367 | Raw mutton | Beijing | 2014    | O100   | H19 | -  | 2e | - |
| STEC368 | Raw mutton | Beijing | 2014    | O104   | H7  | 1c | -  | - |
| STEC369 | Raw mutton | Beijing | 2014    | O22    | H16 | -  | 2d | - |
| STEC370 | Raw mutton | Sichuan | 2014    | O113   | H7  | 1c | -  | - |
| STEC371 | Raw beef   | Sichuan | 2014    | O84    | H20 | 1d | -  | - |
| STEC372 | Raw beef   | Sichuan | 2014    | O76    | H21 | 1a | -  | - |
| STEC373 | Raw mutton | Sichuan | 2014    | O21    | H25 | 1a | -  | - |
| STEC374 | Raw beef   | Beijing | 2014    | O8     | H30 | -  | 2a | - |
| STEC375 | Raw beef   | Beijing | 2014    | O20    | H21 | -  | 2e | - |
| STEC376 | Raw mutton | Beijing | 2014    | O128   | H2  | 1c | 2b | - |
| STEC377 | Raw mutton | Beijing | 2014    | O5     | H9  | 1a | -  | + |
| STEC378 | Raw beef   | Beijing | 2014    | O116   | H21 | 1a | 2a | - |
| STEC379 | Raw pork   | Beijing | 2014    | O8     | H19 | -  | 2e | - |
| STEC380 | Pig        | Beijing | 2014    | O141   | H29 | -  | 2e | - |
| STEC381 | Raw mutton | Beijing | 2014    | O120   | H30 | -  | 2e | - |
| STEC382 | Pig        | Beijing | 2014    | O91    | H4  | -  | 2e | - |
| STEC383 | Pig        | Beijing | 2014    | O172   | H30 | -  | 2e | - |
| STEC384 | Raw pork   | Beijing | 2014    | O8     | H19 | -  | 2e | - |



|         |                   |              |      |        |       |    |       |   |
|---------|-------------------|--------------|------|--------|-------|----|-------|---|
| STEC385 | Raw pork          | Beijing      | 2014 | O91    | H4    | -  | 2e    | - |
| STEC386 | Raw pork          | Beijing      | 2014 | O91    | H4    | -  | 2e    | - |
| STEC387 | Raw pork          | Beijing      | 2014 | O91    | H4    | -  | 2e    | - |
| STEC388 | Pig               | Guizhou      | 2012 | O159   | H16   | -  | 2e    | - |
| STEC389 | Pig               | Guizhou      | 2012 | O100   | H20   | -  | 2e    | - |
| STEC390 | Pig               | Guizhou      | 2012 | NT     | H7    | -  | 2e    | - |
| STEC391 | Pig               | Guizhou      | 2012 | O87    | H10   | -  | 2e    | - |
| STEC392 | Pig               | Guizhou      | 2012 | O100   | H20   | -  | 2e    | - |
| STEC393 | Pig               | Guizhou      | 2012 | NT     | H7    | -  | 2e    | - |
| STEC394 | unknown           | Heilongjiang | 2014 | O26    | H11 - | -  | 2     | + |
| STEC395 | unknown           | Guangxi      | 2014 | O55    | H7 -  | 1  | -     | + |
| STEC397 | Diarrheal patient | Henan        | 2013 | O130   | H8    | 1c | -     | - |
| STEC398 | Diarrheal patient | Henan        | 2013 | O130   | H8    | 1c | -     | - |
| STEC399 | Diarrheal patient | Henan        | 2013 | O130   | H8    | 1c | -     | - |
| STEC400 | Diarrheal patient | Henan        | 2013 | O130   | H8    | 1c | -     | - |
| STEC401 | Diarrheal patient | Henan        | 2013 | O130   | H8    | 1c | -     | - |
| STEC402 | Diarrheal patient | Henan        | 2013 | O117   | H8    | 1c | -     | - |
| STEC403 | Diarrheal patient | Henan        | 2013 | O117   | H8    | 1c | -     | - |
| STEC404 | Diarrheal patient | Henan        | 2013 | O130   | H8    | 1c | -     | - |
| STEC405 | Diarrheal patient | Henan        | 2013 | O117   | H8    | 1c | -     | - |
| STEC406 | Diarrheal patient | Shanghai     | 2012 | O26    | H11   | 1a | -     | + |
| STEC407 | Diarrheal patient | Shanghai     | 2013 | O5     | NT    | 1a | -     | + |
| STEC408 | Diarrheal patient | Shanghai     | 2013 | O21    | H25   | 1a | -     | - |
| STEC409 | Diarrheal patient | Shanghai     | 2013 | NT     | H30   | -  | 2e    | - |
| STEC410 | Diarrheal patient | Shanghai     | 2013 | O149   | H10   | 1c | -     | - |
| STEC411 | Diarrheal patient | Shanghai     | 2013 | O26    | H11   | 1a | -     | + |
| STEC412 | Diarrheal patient | Shanghai     | 2013 | O112ab | H8    | 1a | -     | - |
| STEC413 | Diarrheal patient | Shanghai     | 2014 | O20    | H30   | -  | 2g    | - |
| STEC414 | Diarrheal patient | Shanghai     | 2014 | O104   | H7    | 1c | -     | - |
| STEC415 | Diarrheal patient | Shanghai     | 2014 | O84    | H2    | 1a | -     | + |
| STEC416 | Diarrheal patient | Shanghai     | 2014 | O26    | H11   | 1a | -     | + |
| STEC417 | unknown           | unknown      | 2014 | O104   | H4    | -  | 2a    | - |
| STEC419 | unknown           | unknown      | 2014 | O111   | H8    | 1a | -     | + |
| STEC420 | unknown           | unknown      | 2014 | O146   | H28   | -  | 2b    | - |
| STEC422 | unknown           | unknown      | 2014 | NT     | H7    | 1c | 2b    | - |
| STEC424 | unknown           | unknown      | 2014 | O97    | H26   | 1d | -     | - |
| STEC425 | unknown           | unknown      | 2014 | O26    | H11   | 1a | -     | + |
| STEC426 | unknown           | unknown      | 2014 | O121   | H19   | -  | 2a    | + |
| STEC427 | unknown           | unknown      | 2014 | O166   | H15   | -  | 2d    | - |
| STEC428 | unknown           | unknown      | 2014 | O68    | H14   | -  | 2b    | - |
| STEC429 | unknown           | unknown      | 2014 | O55    | H7    | 1a | -     | + |
| STEC430 | unknown           | unknown      | 2014 | O68    | H2    | 1a | -     | + |
| STEC432 | unknown           | unknown      | 2014 | O111   | H8    | 1a | -     | + |
| STEC433 | unknown           | unknown      | 2014 | O26    | H11   | 1a | -     | + |
| STEC434 | Healthy carrier   | Guangdong    | 2014 | O43    | H2    | -  | 2d    | - |
| STEC435 | Healthy carrier   | Qinghai      | 2013 | O91    | H14   | 1a | 2b    | - |
| STEC437 | Diarrheal patient | Guangdong    | 2010 | O111   | H8    | 1a | -     | - |
| STEC438 | Healthy carrier   | Guangdong    | 2014 | NT     | H21   | 1c | -     | - |
| STEC439 | Plateau Pika      | Qinghai      | 2015 | O169   | H8    | -  | 2b    | - |
| STEC440 | Plateau Pika      | Qinghai      | 2015 | O74    | H8    | -  | 2a+2d | - |
| STEC441 | Plateau Pika      | Qinghai      | 2015 | O49    | H21   | -  | 2b    | - |
| STEC442 | Plateau Pika      | Qinghai      | 2015 | O2     | H45   | 1a | -     | - |
| STEC443 | Plateau Pika      | Qinghai      | 2015 | O119   | H19   | 1a | -     | - |
| STEC444 | Plateau Pika      | Qinghai      | 2015 | O49    | H21   | -  | 2b    | - |

|         |                   |           |      |             |     |    |    |   |
|---------|-------------------|-----------|------|-------------|-----|----|----|---|
| STEC445 | Plateau Pika      | Qinghai   | 2015 | O81         | H21 | -  | 2a | - |
| STEC446 | Plateau Pika      | Qinghai   | 2015 | O96         | H8  | -  | 2d | - |
| STEC447 | Plateau Pika      | Qinghai   | 2015 | O2          | H45 | 1a | -  | - |
| STEC448 | Plateau Pika      | Qinghai   | 2015 | O120        | H9  | 1a | 2d | - |
| STEC449 | Plateau Pika      | Qinghai   | 2015 | O163        | H19 | -  | 2b | - |
| STEC450 | Plateau Pika      | Qinghai   | 2015 | O159        | H21 | 1a | 2d | - |
| STEC451 | Plateau Pika      | Qinghai   | 2012 | O8          | H16 | -  | 2b | - |
| STEC452 | Plateau Pika      | Qinghai   | 2012 | O8          | H2  | -  | 2d | - |
| STEC453 | Plateau Pika      | Qinghai   | 2012 | O8          | H2  | -  | 2d | - |
| STEC454 | Plateau Pika      | Qinghai   | 2012 | O8          | H2  | -  | 2d | - |
| STEC455 | Plateau Pika      | Qinghai   | 2012 | O82         | H19 | 1a | -  | - |
| STEC456 | Plateau Pika      | Qinghai   | 2012 | O2          | H45 | 1a | -  | - |
| STEC457 | Plateau Pika      | Qinghai   | 2012 | O170        | H8  | -  | 2d | - |
| STEC458 | Plateau Pika      | Qinghai   | 2012 | O74         | H8  | 1a | 2d | - |
| STEC459 | Plateau Pika      | Qinghai   | 2012 | O8          | H2  | -  | 2d | - |
| STEC461 | Beef cattle       | Shandong  | 2015 | O177        | NT  | -  | 2c | + |
| STEC463 | Pig               | Shandong  | 2015 | O77         | H30 | -  | 2e | - |
| STEC464 | Pig               | Shandong  | 2015 | O77         | H30 | -  | 2e | - |
| STEC465 | Pig               | Shandong  | 2015 | O86         | H32 | -  | 2e | - |
| STEC466 | Pig               | Shandong  | 2015 | O44         | H30 | -  | 2e | - |
| STEC467 | Pig               | Shandong  | 2015 | O110 (O113) | H30 | -  | 2e | - |
| STEC468 | Pig               | Shandong  | 2015 | O20 O60     | H30 | -  | 2e | - |
| STEC469 | Pig               | Shandong  | 2015 | O10         | H30 | -  | 2e | - |
| STEC470 | Pig               | Shandong  | 2015 | O110        | NT  | -  | 2e | - |
| STEC471 | Pig               | Shandong  | 2015 | O114        | H27 | -  | 2e | - |
| STEC472 | Pig               | Shandong  | 2015 | O20         | H27 | -  | 2e | - |
| STEC473 | Pig               | Shandong  | 2015 | O65         | H9  | -  | 2e | - |
| STEC474 | Pig               | Shandong  | 2015 | O65         | H9  | -  | 2e | - |
| STEC475 | Pig               | Shandong  | 2015 | O8          | NT  | -  | 2e | - |
| STEC476 | Tibetan antelope  | Qinghai   | 2014 | O102        | H8  | 1a | -  | - |
| STEC477 | Tibetan antelope  | Qinghai   | 2014 | O50         | H14 | 1a | -  | - |
| STEC484 | Tibetan antelope  | Qinghai   | 2014 | O105        | H8  | -  | 2  | - |
| STEC485 | Tibetan antelope  | Qinghai   | 2014 | O74         | H8  | -  | 2  | - |
| STEC486 | Tibetan antelope  | Qinghai   | 2014 | O74         | H8  | -  | 2  | - |
| STEC506 | Diarrheal patient | Shandong  | 2014 | O3          | H4  | 1  | -  | - |
| STEC507 | Diarrheal patient | Shandong  | 2016 | O3          | H28 | 1  | -  | - |
| STEC508 | Diarrheal patient | Shanghai  | 2016 | O26         | H11 | 1  | -  | + |
| STEC509 | Healthy carrier   | Guangdong | 2016 | O8          | H19 | -  | 2  | - |
| STEC510 | Beef cattle       | Sichuan   | 2017 | O81         | H31 | 1a | 2a | - |
| STEC511 | Beef cattle       | Sichuan   | 2017 | NT          | H8  | -  | 2a | - |
| STEC512 | Beef cattle       | Sichuan   | 2017 | O84         | H2  | 1a | -  | + |
| STEC513 | Beef cattle       | Sichuan   | 2017 | NT          | H8  | -  | 2a | - |
| STEC514 | Beef cattle       | Sichuan   | 2017 | NT          | H8  | -  | 2a | - |
| STEC515 | Beef cattle       | Sichuan   | 2017 | O81         | H31 | 1a | 2a | - |
| STEC516 | Beef cattle       | Sichuan   | 2017 | NT          | H8  | -  | 2a | - |
| STEC517 | Beef cattle       | Sichuan   | 2017 | O81         | H31 | 1a | 2d | - |
| STEC518 | Beef cattle       | Sichuan   | 2017 | O65         | H19 | -  | 2d | - |
| STEC519 | Beef cattle       | Sichuan   | 2017 | O84         | H2  | 1a | -  | + |
| STEC520 | Beef cattle       | Sichuan   | 2017 | O5(070)     | H31 | 1a | 2c | - |
| STEC521 | Beef cattle       | Sichuan   | 2017 | O84         | H2  | 1a | -  | + |
| STEC522 | Beef cattle       | Sichuan   | 2017 | O177        | NT  | -  | 2c | + |
| STEC523 | Beef cattle       | Sichuan   | 2017 | O84         | H2  | 1a | -  | + |
| STEC524 | Beef cattle       | Sichuan   | 2017 | NT          | H8  | -  | 2a | - |
| STEC525 | Beef cattle       | Sichuan   | 2017 | O81         | H31 | 1a | 2d | - |

|         |             |         |      |         |     |    |    |   |
|---------|-------------|---------|------|---------|-----|----|----|---|
| STEC526 | Beef cattle | Sichuan | 2017 | O5(070) | H31 | 1a | 2c | - |
| STEC527 | Beef cattle | Sichuan | 2017 | O84     | H2  | 1a | -  | + |
| STEC528 | Beef cattle | Sichuan | 2017 | NT      | H8  | -  | 2a | - |
| STEC529 | Beef cattle | Sichuan | 2017 | O8      | H19 | 1a | 2a | - |
| STEC530 | Beef cattle | Sichuan | 2017 | O65     | H19 | -  | 2c | - |
| STEC531 | Beef cattle | Sichuan | 2017 | O5(070) | H31 | 1a | 2c | - |
| STEC532 | Beef cattle | Sichuan | 2017 | O84     | H2  | 1a | -  | + |
| STEC533 | Beef cattle | Sichuan | 2017 | NT      | H8  | -  | 2a | - |
| STEC534 | Beef cattle | Sichuan | 2017 | O65     | H19 | -  | 2c | - |
| STEC535 | Beef cattle | Sichuan | 2017 | O74     | H8  | 1a | 2d | - |
| STEC536 | Beef cattle | Sichuan | 2017 | O84     | H2  | 1a | -  | + |
| STEC537 | Beef cattle | Sichuan | 2017 | O84     | H2  | 1a | -  | + |
| STEC538 | Beef cattle | Sichuan | 2017 | NT      | H8  | -  | 2a | - |
| STEC539 | Beef cattle | Sichuan | 2017 | O81     | H31 | 1a | 2d | - |
| STEC540 | Beef cattle | Sichuan | 2017 | O84     | H2  | 1a | -  | + |
| STEC541 | Beef cattle | Sichuan | 2017 | NT      | H8  | -  | 2a | - |
| STEC542 | Beef cattle | Sichuan | 2017 | O84     | H2  | 1a | -  | + |
| STEC543 | Beef cattle | Sichuan | 2017 | NT      | H8  | -  | 2a | - |
| STEC544 | Beef cattle | Sichuan | 2017 | O84     | H2  | 1a | -  | + |
| STEC545 | Beef cattle | Sichuan | 2017 | NT      | H8  | -  | 2a | - |
| STEC546 | Beef cattle | Sichuan | 2017 | O84     | H2  | 1a | -  | + |
| STEC547 | Beef cattle | Sichuan | 2017 | O81     | H31 | 1a | 2c | - |
| STEC548 | Beef cattle | Sichuan | 2017 | O145    | H12 | 1a | -  | - |
| STEC549 | Beef cattle | Sichuan | 2017 | O81     | H31 | 1a | 2d | - |
| STEC550 | Beef cattle | Sichuan | 2017 | O84     | H2  | 1a | -  | + |
| STEC551 | Beef cattle | Sichuan | 2017 | O84     | H2  | 1a | -  | + |
| STEC552 | Beef cattle | Sichuan | 2017 | NT      | H8  | -  | 2a | - |
| STEC553 | Beef cattle | Sichuan | 2017 | O5(070) | H31 | 1a | 2c | - |
| STEC554 | Beef cattle | Sichuan | 2017 | O84     | H2  | 1a | -  | + |
| STEC555 | Beef cattle | Sichuan | 2017 | O177    | NT  | -  | 2c | + |
| STEC556 | Beef cattle | Sichuan | 2017 | O5(070) | H31 | 1a | 2c | - |
| STEC557 | Beef cattle | Sichuan | 2017 | O177    | NT  | -  | 2c | + |
| STEC558 | Beef cattle | Sichuan | 2017 | O81     | H31 | 1a | 2d | - |
| STEC559 | Beef cattle | Sichuan | 2017 | O76     | H21 | -  | 2d | - |
| STEC560 | Beef cattle | Sichuan | 2017 | O8      | H19 | 1a | 2a | - |
| STEC561 | Beef cattle | Sichuan | 2017 | O96     | H29 | -  | 2d | - |
| STEC562 | Beef cattle | Sichuan | 2017 | O81     | H31 | 1a | 2d | - |
| STEC563 | Beef cattle | Sichuan | 2017 | O8      | H19 | 1a | 2a | - |
| STEC564 | Beef cattle | Sichuan | 2017 | O81     | H31 | 1a | 2c | - |
| STEC565 | Beef cattle | Sichuan | 2017 | O15     | H29 | -  | 2d | - |
| STEC566 | Beef cattle | Sichuan | 2017 | O84     | H2  | 1a | -  | + |
| STEC567 | Beef cattle | Sichuan | 2017 | O81     | H31 | 1a | 2d | - |
| STEC568 | Beef cattle | Sichuan | 2017 | O5(070) | H31 | 1a | 2c | - |
| STEC569 | Beef cattle | Sichuan | 2017 | O65     | H19 | -  | 2c | - |
| STEC570 | Beef cattle | Sichuan | 2017 | O177    | NT  | -  | 2c | + |
| STEC571 | Beef cattle | Sichuan | 2017 | NT      | H8  | -  | 2a | - |
| STEC572 | Beef cattle | Sichuan | 2017 | O22     | H16 | -  | 2d | - |
| STEC573 | Beef cattle | Sichuan | 2017 | O81     | H31 | 1a | 2c | - |
| STEC574 | Beef cattle | Sichuan | 2017 | O177    | NT  | -  | 2c | + |
| STEC575 | Beef cattle | Sichuan | 2017 | O177    | NT  | -  | 2c | + |
| STEC576 | Beef cattle | Sichuan | 2017 | O81     | H31 | 1a | 2a | - |
| STEC577 | Beef cattle | Sichuan | 2017 | O165    | H8  | -  | 2a | - |
| STEC578 | Beef cattle | Sichuan | 2017 | O5(070) | H31 | 1a | 2c | - |
| STEC579 | Beef cattle | Sichuan | 2017 | O84     | H2  | 1a | -  | + |

|         |             |         |      |         |     |    |    |   |
|---------|-------------|---------|------|---------|-----|----|----|---|
| STEC580 | Beef cattle | Sichuan | 2017 | O5(070) | H31 | 1a | 2c | - |
| STEC581 | Beef cattle | Sichuan | 2017 | O81     | H31 | 1a | 2d | - |
| STEC582 | Beef cattle | Sichuan | 2017 | O96     | H29 | -  | 2d | - |
| STEC583 | Beef cattle | Sichuan | 2017 | NT      | H8  | -  | 2a | - |
| STEC584 | Beef cattle | Sichuan | 2017 | O81     | H31 | 1a | 2d | - |
| STEC585 | Beef cattle | Sichuan | 2017 | NT      | H8  | -  | 2a | - |
| STEC586 | Beef cattle | Sichuan | 2017 | O5(070) | H31 | 1a | 2d | - |
| STEC587 | Beef cattle | Sichuan | 2017 | NT      | H8  | -  | 2a | - |
| STEC588 | Beef cattle | Sichuan | 2017 | O81     | H31 | 1a | 2a | - |
| STEC589 | Beef cattle | Sichuan | 2017 | O166    | H29 | -  | 2d | - |
| STEC590 | Beef cattle | Sichuan | 2017 | O5(070) | H31 | 1a | 2c | - |
| STEC591 | Beef cattle | Sichuan | 2017 | O84     | H2  | 1a | -  | + |
| STEC592 | Beef cattle | Sichuan | 2017 | NT      | H8  | -  | 2a | - |
| STEC593 | Beef cattle | Sichuan | 2017 | O5(070) | H31 | 1a | 2c | - |
| STEC594 | Beef cattle | Sichuan | 2017 | NT      | H8  | -  | 2a | - |
| STEC595 | Beef cattle | Sichuan | 2017 | NT      | H8  | -  | 2a | - |
| STEC596 | Beef cattle | Sichuan | 2017 | O96     | H29 | -  | 2d | - |
| STEC597 | Beef cattle | Sichuan | 2017 | O5(070) | H31 | 1a | 2c | - |
| STEC598 | Beef cattle | Sichuan | 2017 | NT      | H8  | -  | 2a | - |
| STEC599 | Beef cattle | Sichuan | 2017 | O5(070) | H31 | 1a | 2c | - |
| STEC600 | Beef cattle | Sichuan | 2017 | O84     | H2  | 1a | -  | + |
| STEC601 | Beef cattle | Sichuan | 2017 | O84     | H2  | 1a | -  | + |
| STEC602 | Beef cattle | Sichuan | 2017 | O84     | H2  | 1a | -  | + |
| STEC603 | Beef cattle | Sichuan | 2017 | O81     | H31 | 1a | 2d | - |
| STEC604 | Beef cattle | Sichuan | 2017 | O84     | H2  | 1a | -  | + |
| STEC605 | Beef cattle | Sichuan | 2017 | NT      | H8  | -  | 2a | - |
| STEC606 | Beef cattle | Sichuan | 2017 | O81     | H31 | 1a | 2d | - |
| STEC607 | Beef cattle | Sichuan | 2017 | O84     | H2  | 1a | -  | + |
| STEC608 | Beef cattle | Sichuan | 2017 | NT      | H8  | -  | 2a | - |
| STEC609 | Beef cattle | Sichuan | 2017 | O5(070) | H31 | 1a | 2c | - |
| STEC610 | Beef cattle | Sichuan | 2017 | O8      | H19 | 1a | 2a | - |
| STEC611 | Beef cattle | Sichuan | 2017 | O177    | NT  | -  | 2c | + |
| STEC612 | Beef cattle | Sichuan | 2017 | O81     | H31 | 1a | 2d | - |
| STEC613 | Beef cattle | Sichuan | 2017 | O84     | H2  | 1a | -  | + |
| STEC614 | Beef cattle | Sichuan | 2017 | O5(070) | H31 | 1a | 2c | - |
| STEC615 | Beef cattle | Sichuan | 2017 | O166    | H29 | -  | 2d | - |
| STEC616 | Beef cattle | Sichuan | 2017 | O84     | H2  | 1a | -  | + |
| STEC617 | Beef cattle | Sichuan | 2017 | O81     | H31 | 1a | 2c | - |
| STEC618 | Beef cattle | Sichuan | 2017 | O81     | H31 | 1a | 2d | - |
| STEC619 | Beef cattle | Sichuan | 2017 | O22     | H16 | -  | 2d | - |
| STEC620 | Beef cattle | Sichuan | 2017 | O84     | H2  | 1a | -  | + |
| STEC621 | Beef cattle | Sichuan | 2017 | O81     | H31 | 1a | 2d | - |
| STEC622 | Beef cattle | Sichuan | 2017 | O5(070) | H31 | 1a | 2c | - |
| STEC623 | Beef cattle | Sichuan | 2017 | O84     | H2  | 1a | -  | + |
| STEC624 | Beef cattle | Sichuan | 2017 | O81     | H31 | 1a | 2d | - |
| STEC625 | Beef cattle | Sichuan | 2017 | O116    | H10 | 1a | 2a | - |
| STEC626 | Beef cattle | Sichuan | 2017 | O81     | H31 | 1a | 2a | - |
| STEC627 | Beef cattle | Sichuan | 2017 | O8      | H19 | 1a | 2a | - |
| STEC628 | Beef cattle | Sichuan | 2017 | O84     | H2  | 1a | -  | + |
| STEC629 | Beef cattle | Sichuan | 2017 | O84     | H2  | 1a | -  | + |
| STEC630 | Beef cattle | Sichuan | 2017 | O81     | H31 | -  | 2a | - |
| STEC631 | Beef cattle | Sichuan | 2017 | O5(070) | H31 | 1a | 2c | - |
| STEC632 | Beef cattle | Sichuan | 2017 | O81     | H29 | -  | 2d | - |
| STEC633 | Beef cattle | Sichuan | 2017 | O84     | H2  | 1a | -  | - |

|         |             |         |      |      |     |    |    |   |
|---------|-------------|---------|------|------|-----|----|----|---|
| STEC634 | Beef cattle | Sichuan | 2017 | O81  | H31 | 1a | 2d | - |
| STEC635 | Beef cattle | Sichuan | 2017 | O8   | H19 | 1a | 2a | - |
| STEC636 | Goat        | Sichuan | 2017 | NT   | H21 | 1c | -  | - |
| STEC637 | Goat        | Sichuan | 2017 | NT   | H21 | 1c | -  | - |
| STEC638 | Goat        | Sichuan | 2017 | NT   | H21 | 1c | -  | - |
| STEC639 | Goat        | Sichuan | 2017 | O21  | H25 | 1a | -  | - |
| STEC640 | Goat        | Sichuan | 2017 | O22  | H16 | -  | 2b | - |
| STEC641 | Goat        | Sichuan | 2017 | O22  | H16 | -  | 2b | - |
| STEC642 | Goat        | Sichuan | 2017 | O22  | H16 | -  | 2b | - |
| STEC643 | Goat        | Sichuan | 2017 | O22  | H16 | -  | 2b | - |
| STEC644 | Goat        | Sichuan | 2017 | O22  | H16 | -  | 2b | - |
| STEC645 | Goat        | Sichuan | 2017 | O22  | H16 | -  | 2b | - |
| STEC646 | Goat        | Sichuan | 2017 | O22  | H16 | -  | 2b | - |
| STEC647 | Goat        | Sichuan | 2017 | O22  | H16 | -  | 2b | - |
| STEC648 | Goat        | Sichuan | 2017 | NT   | H8  | 1c | -  | - |
| STEC649 | Goat        | Sichuan | 2017 | O22  | H16 | -  | 2b | - |
| STEC650 | Goat        | Sichuan | 2017 | O21  | H25 | 1a | -  | - |
| STEC651 | Goat        | Sichuan | 2017 | O22  | H16 | -  | 2b | - |
| STEC652 | Goat        | Sichuan | 2017 | O22  | H16 | -  | 2b | - |
| STEC653 | Goat        | Sichuan | 2017 | O21  | H25 | 1a | -  | - |
| STEC654 | Goat        | Sichuan | 2017 | NT   | H25 | 1c | -  | - |
| STEC655 | Goat        | Sichuan | 2017 | O22  | H16 | -  | 2b | - |
| STEC656 | Goat        | Sichuan | 2017 | NT   | H21 | 1c | -  | - |
| STEC657 | Goat        | Sichuan | 2017 | O22  | H16 | -  | 2b | - |
| STEC658 | Goat        | Sichuan | 2017 | O21  | H25 | 1a | -  | - |
| STEC659 | Goat        | Sichuan | 2017 | O21  | H25 | 1a | -  | - |
| STEC660 | Goat        | Sichuan | 2017 | O21  | H25 | 1a | -  | - |
| STEC661 | Goat        | Sichuan | 2017 | O21  | H25 | 1a | -  | - |
| STEC662 | Goat        | Sichuan | 2017 | O21  | H25 | 1a | -  | - |
| STEC663 | Goat        | Sichuan | 2017 | O21  | H25 | 1a | -  | - |
| STEC664 | Goat        | Sichuan | 2017 | O71  | H19 | 1c | -  | - |
| STEC665 | Goat        | Sichuan | 2017 | O21  | H25 | 1a | -  | - |
| STEC666 | Goat        | Sichuan | 2017 | O21  | H25 | 1a | -  | - |
| STEC667 | Goat        | Sichuan | 2017 | O21  | H25 | 1a | -  | - |
| STEC668 | Goat        | Sichuan | 2017 | O21  | H25 | 1a | -  | - |
| STEC669 | Goat        | Sichuan | 2017 | O21  | H25 | 1a | -  | - |
| STEC670 | Goat        | Sichuan | 2017 | O21  | H25 | 1a | -  | - |
| STEC671 | Goat        | Sichuan | 2017 | O21  | H25 | 1a | -  | - |
| STEC672 | Goat        | Sichuan | 2017 | O21  | H25 | 1a | -  | - |
| STEC673 | Goat        | Sichuan | 2017 | O21  | H25 | 1a | -  | - |
| STEC674 | Goat        | Sichuan | 2017 | O21  | H25 | 1a | -  | - |
| STEC675 | Goat        | Sichuan | 2017 | O21  | H25 | 1a | -  | - |
| STEC676 | Goat        | Sichuan | 2017 | O21  | H25 | 1a | -  | - |
| STEC677 | Goat        | Sichuan | 2017 | O21  | H25 | 1a | -  | - |
| STEC678 | Goat        | Sichuan | 2017 | O21  | H25 | 1a | -  | - |
| STEC679 | Goat        | Sichuan | 2017 | O21  | H25 | 1a | -  | - |
| STEC680 | Goat        | Sichuan | 2017 | O21  | H25 | 1a | -  | - |
| STEC681 | Goat        | Sichuan | 2017 | O21  | H25 | 1a | -  | - |
| STEC682 | Goat        | Sichuan | 2017 | O21  | H25 | 1a | -  | - |
| STEC683 | Goat        | Sichuan | 2017 | O21  | H25 | 1a | -  | - |
| STEC684 | Goat        | Sichuan | 2017 | O22  | H16 | -  | 2b | - |
| STEC685 | Goat        | Sichuan | 2017 | O22  | H16 | -  | 2b | - |
| STEC686 | Goat        | Sichuan | 2017 | O150 | H8  | 1c | -  | - |
| STEC687 | Goat        | Sichuan | 2017 | O116 | H19 | 1c | -  | - |

|         |             |          |      |      |     |    |    |   |
|---------|-------------|----------|------|------|-----|----|----|---|
| STEC688 | Goat        | Sichuan  | 2017 | O22  | H16 | -  | 2b | - |
| STEC689 | Beef cattle | Shandong | 2017 | O44  | NT  | 1a | -  | + |
| STEC690 | Beef cattle | Shandong | 2017 | O116 | NT  | -  | 2c | + |
| STEC691 | Beef cattle | Shandong | 2017 | O5   | NT  | -  | 2c | + |
| STEC692 | Goat        | Shandong | 2017 | O118 | H21 | 1  | -  | - |
| STEC693 | Goat        | Shandong | 2017 | O50  | H2  | 1  | -  | - |
| STEC694 | Goat        | Shandong | 2017 | O53  | H2  | 1  | -  | - |
| STEC695 | Goat        | Shandong | 2017 | O50  | H25 | 1  | -  | - |
| STEC696 | Goat        | Shandong | 2017 | O74  | NT  | 1  | 2  | - |
| STEC697 | Goat        | Shandong | 2017 | O74  | NT  | 1  | -  | - |
| STEC698 | Beef cattle | Shandong | 2017 | O55  | H10 | 1  | -  | - |
| STEC699 | Beef cattle | Shandong | 2017 | O28  | H10 | 1  | -  | - |
| STEC700 | Goat        | Shandong | 2017 | O115 | H25 | 1  | -  | - |
| STEC701 | Goat        | Shandong | 2017 | OUT  | H4  | 1  | -  | - |
| STEC702 | Goat        | Shandong | 2017 | O44  | H21 | -  | 2  | - |
| STEC703 | Beef cattle | Shandong | 2017 | O75  | H29 | -  | 2  | - |
| STEC704 | Goat        | Shandong | 2017 | O115 | H28 | -  | 2  | - |
| STEC705 | Goat        | Shandong | 2017 | O110 | H28 | -  | 2  | - |
| STEC706 | Beef cattle | Shandong | 2017 | O19  | NT  | -  | 2  | - |
| STEC707 | Beef cattle | Shandong | 2017 | O71  | H8  | -  | 2  | - |
| STEC708 | Beef cattle | Shandong | 2017 | O2   | NT  | -  | 2  | - |
| STEC709 | Goat        | Shandong | 2017 | O116 | H28 | -  | 2  | - |
| STEC710 | Goat        | Shandong | 2017 | O74  | H28 | -  | 2  | - |
| STEC711 | Goat        | Shandong | 2017 | O74  | H8  | -  | 2  | - |
| STEC712 | Goat        | Shandong | 2017 | O65  | H51 | -  | 2  | - |
| STEC713 | Goat        | Shandong | 2017 | O50  | H28 | -  | 2  | - |
| STEC714 | Goat        | Shandong | 2017 | O50  | H28 | -  | 2  | - |
| STEC715 | Goat        | Shandong | 2017 | O50  | H28 | -  | 2  | - |
| STEC716 | Goat        | Shandong | 2017 | O19  | H28 | -  | 2  | - |
| STEC717 | Goat        | Shandong | 2017 | OUT  | H31 | -  | 2  | - |
| STEC718 | Goat        | Shandong | 2017 | O116 | H30 | -  | 2  | - |
| STEC719 | Goat        | Shandong | 2017 | O65  | H28 | -  | 2  | - |
| STEC720 | Goat        | Shandong | 2017 | O55  | H8  | -  | 2  | - |
| STEC721 | Goat        | Shandong | 2017 | O19  | H28 | -  | 2  | - |
| STEC722 | Goat        | Shandong | 2017 | O65  | H28 | -  | 2  | - |
| STEC723 | Goat        | Shandong | 2017 | O28  | H25 | -  | 2  | - |
| STEC724 | Goat        | Shandong | 2017 | O19  | H8  | -  | 2  | - |
| STEC725 | Goat        | Shandong | 2017 | O23  | H25 | -  | 2  | - |
| STEC726 | Goat        | Shandong | 2017 | O55  | NT  | -  | 2  | - |
| STEC727 | Goat        | Shandong | 2017 | O23  | H4  | 1  | 2  | - |
| STEC728 | Goat        | Shandong | 2017 | O23  | H4  | 1  | 2  | - |
| STEC729 | Goat        | Shandong | 2017 | O74  | H4  | 1  | 2  | - |
| STEC730 | Goat        | Shandong | 2017 | O23  | H4  | 1  | 2  | - |
| STEC731 | Goat        | Shandong | 2017 | O74  | H4  | 1  | 2  | - |
| STEC732 | Goat        | Shandong | 2017 | O23  | H4  | 1  | 2  | - |
| STEC733 | Goat        | Shandong | 2017 | O23  | H7  | 1  | 2  | - |
| STEC734 | Beef cattle | Shandong | 2017 | O38  | H31 | 1  | 2  | - |
| STEC735 | Goat        | Shandong | 2017 | O23  | H4  | 1  | 2  | - |
| STEC736 | Goat        | Shandong | 2017 | O23  | H4  | 1  | 2  | - |
| STEC737 | Goat        | Shandong | 2017 | O23  | H4  | 1  | 2  | - |
| STEC738 | Goat        | Shandong | 2017 | O23  | H4  | 1  | 2  | - |
| STEC739 | Beef cattle | Shandong | 2017 | O23  | H10 | 1  | 2  | - |
| STEC740 | Goat        | Shandong | 2017 | O50  | H4  | 1  | 2  | - |
| STEC741 | Beef cattle | Shandong | 2017 | O30  | H38 | 1  | 2  | - |

|         |                   |          |      |      |     |    |    |   |
|---------|-------------------|----------|------|------|-----|----|----|---|
| STEC742 | Goat              | Shandong | 2017 | O114 | H19 | 1  | 2  | - |
| STEC743 | Goat              | Shandong | 2017 | O7   | H19 | 1  | 2  | - |
| STEC744 | Goat              | Shandong | 2017 | O23  | H4  | 1  | 2  | - |
| STEC745 | Goat              | Shandong | 2017 | O23  | H4  | 1  | 2  | - |
| STEC746 | Goat              | Shandong | 2017 | O23  | H4  | 1  | 2  | - |
| STEC747 | Goat              | Shandong | 2017 | O3   | H4  | 1  | 2  | - |
| STEC748 | Goat              | Shandong | 2017 | O3   | H4  | 1  | 2  | - |
| STEC749 | Goat              | Shandong | 2017 | O23  | H4  | 1  | 2  | - |
| STEC750 | Goat              | Shandong | 2017 | O19  | H16 | 1  | 2  | - |
| STEC751 | Goat              | Shandong | 2017 | O74  | H4  | 1  | 2  | - |
| STEC752 | Goat              | Shandong | 2017 | O3   | H4  | 1  | 2  | - |
| STEC753 | Goat              | Shandong | 2017 | O23  | H4  | 1  | 2  | - |
| STEC754 | Goat              | Shandong | 2017 | O23  | H4  | 1  | 2  | - |
| STEC755 | Goat              | Shandong | 2017 | O5   | H19 | 1  | 2  | - |
| STEC756 | Goat              | Shandong | 2017 | O62  | H8  | 1  | 2  | - |
| STEC757 | Goat              | Shandong | 2017 | O39  | H2  | 1  | 2  | - |
| STEC758 | Goat              | Shandong | 2017 | O115 | H2  | 1  | 2  | - |
| STEC759 | Goat              | Shandong | 2017 | O74  | H4  | 1  | 2  | - |
| STEC760 | Goat              | Shandong | 2017 | O50  | NT  | 1  | 2  | - |
| STEC761 | Goat              | Shandong | 2017 | O19  | H4  | 1  | 2  | - |
| STEC762 | Goat              | Shandong | 2017 | O74  | H4  | 1  | 2  | - |
| STEC763 | Goat              | Shandong | 2017 | O74  | H4  | 1  | 2  | - |
| STEC764 | Beef cattle       | Shandong | 2017 | O38  | H4  | 1  | 2  | - |
| STEC765 | Goat              | Shandong | 2017 | O71  | H19 | 1  | 2  | - |
| STEC766 | Goat              | Shandong | 2017 | O7   | H19 | 1  | 2  | - |
| STEC767 | Goat              | Shandong | 2017 | O53  | H4  | 1  | 2  | - |
| STEC768 | Goat              | Shandong | 2017 | O23  | H4  | 1  | 2  | - |
| STEC769 | Goat              | Shandong | 2017 | O38  | H4  | 1  | 2  | - |
| STEC770 | Goat              | Shandong | 2017 | O18  | H25 | 1  | -  | - |
| STEC771 | Goat              | Shandong | 2017 | O57  | H25 | 1  | -  | - |
| STEC772 | Goat              | Shandong | 2017 | O90  | H19 | 1  | -  | - |
| STEC773 | Goat              | Shandong | 2017 | O74  | H19 | 1  | -  | - |
| STEC774 | Goat              | Shandong | 2017 | O74  | H8  | 1  | -  | - |
| STEC788 | Water             | Shandong | 2017 | NT   | NT  | -  | 2  | - |
| STEC789 | Goat              | Shandong | 2017 | NT   | NT  | 1  | 2  | - |
| STEC790 | Beef cattle       | Shandong | 2017 | NT   | NT  | 1a | 2a | + |
| STEC791 | Goat              | Shandong | 2017 | O19  | H19 | 1  | -  | - |
| STEC801 | Diarrheal patient | Beijing  | 2018 | NT   | H7  | 1a | 2c | + |
